# Supplementary material for: The provenance and persistence of the perennial Río Loa in the Atacama Desert: links between crustal processes and surface hydrology
Source: Frontiers journal article supplement (doi:10.3389/feart.2023.1310088), 2023-12-18
Supplement: Data_Sheet_1.PDF [file Data_Sheet_1.PDF]

## *Supplementary Material*

### **The provenance and persistence of the perennial Río Loa in the Atacama Desert: Links between crustal processes and surface hydrology.**

**John Houston**

Correspondence: [houston.jft@gmail.com](mailto:houston.jft@gmail.com)

#### **S1. Minor Springs**

Apart from the major springs that represent surface water sources, given in the main text (Table 4) and incorporated into the main text analysis, small springs occur at several locations in the Loa catchment (main text Fig 2b): (a) near Angostura in the centre of the Calama Basin, (b) Laguna Inca Coya a doline close to the confluence of the Ríos Loa and Salado in the centre of the Calama Basin, (c) an unnamed spring adjacent to the Río Salado between localities 17 and 18, (d) Aguada de la Teca in the south-east of the Calama Basin, and (e) Chitor in the central eastern part of the Calama Basin. The combined flow from these disparate springs was  $\leq 0.02 \text{ m}^3/\text{s}$  in March 2000, so that although their chemistry is interesting (see Table S4) they do not appear to be volumetrically important.

Table S1 Small spring chemistry compared with adjacent river or groundwater source.

| Fig 2 ref # | Location                | Date   | Lat    | Long   | Elevation (m a.s.l.) | pH   | TDS   | Na   | K    | Ca   | Mg  | HCO <sub>3</sub> | SO <sub>4</sub> | Cl   | mean ionic ratio | correlation coefficient | <sup>3</sup> H (TU) |
|-------------|-------------------------|--------|--------|--------|----------------------|------|-------|------|------|------|-----|------------------|-----------------|------|------------------|-------------------------|---------------------|
| mg/L        |                         |        |        |        |                      |      |       |      |      |      |     |                  |                 |      |                  |                         |                     |
| a           | Angostura spring        | Mar-00 | -22.46 | -68.73 | 2475                 | 6.62 | 3950  | 1054 | 59   | 156  | 91  | 470              | 198             | 2015 | a/9 =            | a:9 =                   | n/a                 |
| 9           | Río Loa Angostura       | Mar-00 | -22.46 | -68.73 | 2460                 | 7.7  | 3431  | 920  | 55   | 180  | 83  | 233              | 161             | 1800 | 1.223            | 0.994                   | n/a                 |
| b           | Chiu chiu doline        | Mar-00 | -22.33 | -68.60 | 2545                 | 8.1  | 4486  | 1290 | 103  | 149  | 85  | 93               | 166             | 2600 | b/16 =           | b:16 =                  | n/a                 |
| 16          | Río Salado Chiu chiu rd | Mar-00 | -22.33 | -68.56 | 2555                 | 7.21 | 3350  | 996  | 73.3 | 136  | 66  | 239              | 99              | 1740 | 1.234            | 0.993                   | n/a                 |
| c           | Río Salado spring       | Mar-00 | -22.28 | -68.23 | 3090                 | 7.4  | 5947  | 1660 | 117  | 356  | 106 | 811              | 127             | 2770 | c/21 =           | c:21 =                  | 1.71±0.21           |
| 21          | Río Salado              | Mar-00 | -22.28 | -68.23 | 3060                 | 7.6  | 6839  | 2100 | 76   | 409  | 158 | 283              | 93              | 3720 | 1.264            | 0.979                   | n/a                 |
| d           | Aguada la Teca          | Mar-00 | -22.60 | -68.53 | 2950                 | 7.8  | 798   | 70   | 2.4  | 147  | 18  | 158              | 331             | 71   |                  |                         | 1.98±0.22           |
| 22          | El Tatio outflow        | Mar-00 | -22.33 | -68.03 | 4228                 | 7.9  | 4813  | 1630 | 123  | 87   | 10  | 77               | 75              | 2810 | 22/e =           | 22:e =                  | n/a                 |
| e           | Chitor spring           | Mar-00 | -22.42 | -68.17 | 3720                 | 7.8  | 5385  | 1520 | 127  | 61   | 107 | 310              | 250             | 3010 | 0.720            | 0.993                   | n/a                 |
| PL          | PL avg - Sn. Low. Aq.   | Mar-00 | -22.48 | -68.55 | 2612                 | 6.4  | 12028 | 3580 | 156  | 1023 | 142 | 633              | 490             | 6005 | e/PL =           | e:PL =                  | n/a                 |
|             |                         |        |        |        |                      |      |       |      |      |      |     |                  |                 |      | 0.510            | 0.985                   |                     |

In Table S1 comparative samples for major ion analysis are given for March 2000. All spring samples were 22-26% more concentrated than the adjacent river sample, but otherwise indistinguishable (major ion correlation coefficients 0.979-0.993;  $p < 0.001$ ), suggesting that the springs incorporated small fluxes from adjacent bank or active storage during the waning stage of interflow. However, Chitor spring falls on an evolutionary path for Na:Cl and SO<sub>4</sub>:Cl from El Tatio to the Southern Lower Aquifer (PL), a potential flow path distinct from others in the catchment. Aguada de la Teca stands alone with a low TDS, whilst having relatively high Ca and HCO<sub>3</sub> and a <sup>3</sup>H value of 1.98 TU, suggestive of modern water entering from the south-east.

The results for springs a-c therefore preclude the possibility of their origin being from the Lower Aquifers in the Calama Basin, although the sample from Chitor (e) does not.

## S2. Precipitation-runoff

Detailed analysis of the upper station hydrographs indicates a variable component to flow in some years. The variable component is taken to be flow rates above the given time-invariant component. By correlating daily rainfall with daily time-variant flow above a threshold (equal to time-invariant flow) and lagged by 1-5 days gives an indication of its significance. For the Río Salado at El Sifon (locality 17) the maximum correlation coefficient ( $r$ ) with rainfall is 0.159 at a lag of 3 days ( $N=9484$ ,  $p<0.0001$ ), and for the Río Loa antes Lequena (locality 12) the maximum  $r$  is 0.233 at a lag of 1 day ( $N=8707$ ,  $p<0.0001$ ). Furthermore the significant correlation between rainfall and runoff greater than time-invariant flow occurs on average 18 days/year in the Río Salado and 28 days/year in the Río Loa. This illuminates the role of precipitation in generating time-variant flow, either by direct runoff or via interflow, whilst the shorter lag time for the Río Loa compared with the Río Salado suggests higher runoff - lower infiltration rates in the former catchment.

## S3. Calculation of evaporation

Pan evaporation was corrected for actual evaporation at several sites within the Río Loa catchment (Houston, 2006) using a pan factor and multiplied by the evaporating area, which has been estimated as the product of riparian width and channel length to provide an estimate for catchment evapotranspiration (Table S2). Whilst channel length is known, the width contributing to evaporation is not. The width in Table S2 was iteratively changed until bulk evaporation losses were close to those estimated from the kinetic fractionation of  $^{18}\text{O}$  (see main body text, section 4.4) equal to 34% of low flow for the Río Loa and 21% for the Río Salado. On this basis contributing widths orthogonal to the rivers are 20 m and 43 m for the Ríos Salado and Loa respectively. Such widths can be justified on the basis that they fall within measured riparian widths, coupled with the observation that the Río Salado is constrained by a narrow canyon throughout much of its length from its source to El Sifon, whilst the Loa flood plain is considerably wider, especially in the Calama Basin.

Table S2 Estimated catchment evaporation rates

|                                                          | Salado<br>El Sifon | Loa antes<br>Lequena | Calama<br>Yalquinche |
|----------------------------------------------------------|--------------------|----------------------|----------------------|
| Aerially weighted catchment elevation (m a.s.l.)         | 4216               | 4157                 | 3650                 |
| Pan evaporation rate (mm/d)*                             | 4.7                | 5.2                  | 6.1                  |
| Pan factor pan>actual                                    | 0.88               | 0.88                 | 0.88                 |
| Actual evapotranspiration rate (mm/d)                    | 4.2                | 4.6                  | 5.3                  |
| Reach length (km)                                        | 61                 | 69                   | 104                  |
| Reach riparian width (m)**                               | 15                 | 33                   | 33                   |
| Actual evapotranspiration rate ( $\text{m}^3/\text{s}$ ) | 0.044              | 0.121                | 0.212                |
| Actual evapotranspiration as % of baseflow               | 12%                | 20%                  | 19%                  |

\* Houston, 2006

\*\*based on balancing actual evaporation with  $\delta^{18}\text{O}$  kinetic evaporation - see text

## S4. Diffusivity

Diffusivity is defined as  $D = Kb / Sy$  (main text equation 4). It is possible to make an informed guess for the bulk physical properties of the storage reservoirs, although such combinations are not unique. With  $D$  between  $\sim 1500\text{-}1900 \text{ m}^2/\text{s}$  (main text Table 1 and Supplementary Table S2) for the upper subcatchments and assuming  $Sy = 0.01$ , and  $b = 200 \text{ m}$ ,  $K$  would be between  $7\text{-}9 \times 10^{-2} \text{ m/s}$ ,

indicative of unconsolidated coarse clastic or pyroclastic deposits. For the total catchment at Calama the extremely high diffusivity is probably due to deep circulation in the Calama Basin. Thus, increasing  $b$  to 1000 m, the hydraulic conductivity would be ca.  $2 \times 10^{-1}$  m/s. This storage coefficient is chosen to represent semi-confined conditions, to be expected in these heterogeneous, layered aquifers, whilst the values of inferred hydraulic conductivity are appreciably greater than pumping test values in the Calama and Turi Basins (Houston, 2004), conceivably due to scaling differences.

Table S3 Aquifer physical properties based on subcatchment diffusivity

|                                          | Salado<br>El Sifon | Loa antes<br>Lequena | Calama<br>Yalquinche |
|------------------------------------------|--------------------|----------------------|----------------------|
| $D = 4L^2 / \pi^2 k$ (m <sup>2</sup> /s) | 1509               | 1930                 | 17538                |
| $S_y$                                    | 1.0E-03            | 1.0E-03              | 1.0E-03              |
| $b$ (m)                                  | 200                | 200                  | 1000                 |
| $K$ (m/s)                                | 7.5E-03            | 9.7E-03              | 1.8E-02              |
| Calama basin ppg test $K$                |                    |                      | 1.2E-03              |
| Turi basin ppg test $K$                  | 2.3E-04            |                      |                      |

## S5. Saturation Indices

Calculated using PHREEQC (Parkhurst and Appelo, 2013) with the <phreeqc.dat> thermodynamic database for DIC,  $P_{CO_2}$ , and saturation indices (SI) for calcite, dolomite, gypsum and quartz (see main text section 4.1).

Table S3 Saturation indices for baseflow samples

| Fig 1<br>ref # | Location                    | River system    | Dist from ocean<br>(km) | pH  | DIC<br>mmol/L | SI <sub>calcite</sub> | SI <sub>dolomite</sub> | SI <sub>gypsum</sub> | SI <sub>quartz</sub> |
|----------------|-----------------------------|-----------------|-------------------------|-----|---------------|-----------------------|------------------------|----------------------|----------------------|
| 1              | Rio Loa al mar              | Loa             | 0                       | 7.0 | 3.9           | 0.14                  | 0.29                   | -0.31                | 0.89                 |
| 2              | Rio Loa Quillagua           | Loa             | 60                      | 7.8 | 6.2           | 0.99                  | 2.15                   | -0.77                | 0.93                 |
| 3              | Cruce Las Torres            | Loa             | 138                     | 8.7 | 6.1           | 1.45                  | 3.77                   | -0.91                | 0.96                 |
| 4              | Rio Loa Chacance            | Loa             | 173                     | 7.8 | 7.8           | 0.89                  | 1.26                   | -0.87                | 0.98                 |
| 5              | Rio San Salvador Chacance   | San Salvador    | 175                     | 8.1 | 7.6           | 1.36                  | 2.79                   | -0.84                | 1.12                 |
| 6              | Ojos de Opache              | San Salvador    | 226                     | 7.9 | 7.2           | 1.16                  | 2.32                   | -1.02                | 1.15                 |
| 7              | Rio Loa Cascad              | Loa             | 228                     | 8.1 | 6.7           | 1.36                  | 2.78                   | -1.29                | 1.11                 |
| 8              | Rio San Salvador above OdeO | San Salvador    | 231                     | 8.2 | 7.8           | 1.43                  | 2.79                   | -0.82                | 0.79                 |
| 9              | Rio Loa Angostura           | Loa             | 258                     | 8.0 | 7.8           | 1.22                  | 2.41                   | -1.19                | 1.04                 |
| 10             | Rio Loa Lasana              | Loa             | 281                     | 8.4 | 6.7           | 1.32                  | 2.92                   | -1.49                | 1.02                 |
| 11             | Rio Loa above Conchi        | Loa             | 333                     | 8.0 | 11.7          | 0.71                  | 1.43                   | -1.36                | 1.16                 |
| 12             | Rio Loa above Bol rly       | Loa             | 370                     | 7.8 | 4.5           | 0.45                  | 0.73                   | -1.43                | 1.17                 |
| 13             | Chela sp                    | Loa             | 411                     | 8.3 | 3.2           | 0.93                  | 1.24                   | -1.61                | 1.18                 |
| 14             | Ojos de San Pedro           | San Pedro       | 351                     | 8.3 | 5.8           | 0.18                  | 0.49                   | -1.94                | 1.25                 |
| 15             | Incaliri                    | San Pedro       | 363                     | 8.0 | 2.1           | -0.32                 | -0.69                  | -2.43                | 0.99                 |
| 16             | Rio Salado Chiu Chiu rd     | Salado          | 312                     | 8.0 | 4.3           | 0.81                  | 1.79                   | -1.69                | 1.00                 |
| 17             | Rio Salado Sifon            | Salado          | 321                     | 8.0 | 11.0          | 0.53                  | 0.87                   | -1.60                | 1.18                 |
| 18             | Rio Toconce at Toconce repr | Toconce         | 341                     | 8.1 | 1.6           | -0.09                 | -0.29                  | -2.60                | 1.13                 |
| 19             | Rio Toconce at Linzor       | Toconce/Hojalar | 360                     | 7.3 | 6.8           | -1.50                 | -3.01                  | -2.43                | 1.15                 |
| 20             | Rio Hojalar above Linzor    | Toconce/Hojalar | 356                     | 8.1 | 2.4           | -0.79                 | -1.58                  | -2.83                | 1.11                 |
| 21             | Rio Salado                  | Salado          | 332                     | 7.7 | 1.4           | 1.24                  | 2.60                   | -1.58                | 0.79                 |
| 22             | El Tatio outflow            | Salado          | 359                     | 7.4 | 2.0           | 0.02                  | -0.98                  | -1.81                | 1.46                 |

## S6. Interflow vs baseflow chemistry

Interflow chemistry sampled in March 2000 shows dilution when compared with baseflow chemistry sampled in October 1999 (main text, Table 4). The Schoeller plot (Fig S1 below) shows concentrations of samples for the two conditions. Interflow demonstrates similar characteristics to the baseflow samples, the main difference being a concentration dilution across all ions of 16-24%.

Figure S1 Comparison of ionic strengths of interflow and baseflow for the R o Loa catchment using a schoeller plot of the data in Table 4, main text.

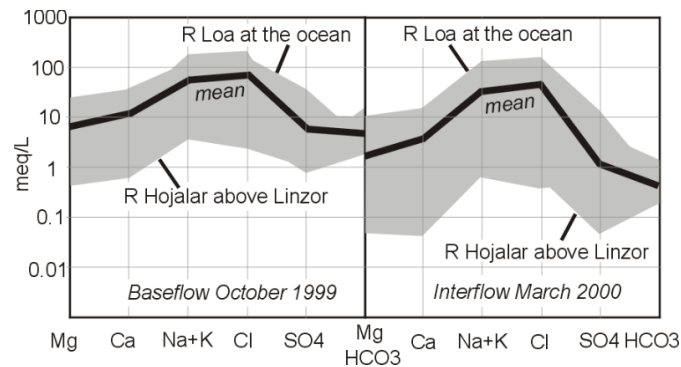

## Supplementary References

Houston, J., 2004. High-resolution sequence stratigraphy as a tool in hydrogeological exploration in the Atacama Desert. *Quarterly Journal of Engineering Geology and Hydrogeology*, 37(1), pp.7-17.

Houston, J., 2006. Evaporation in the Atacama Desert: An empirical study of spatio-temporal variations and their causes. *Journal of Hydrology*, 330(3-4), pp.402-412.

Parkhurst, D.L. and Appelo, C.A.J., 2013. Description of input and examples for PHREEQC version 3—a computer program for speciation, batch-reaction, one-dimensional transport, and inverse geochemical calculations. *US geological survey techniques and methods*, 6(A43), p.497.
